# Supplementary material
Source: publisher site journal article supplement (https://www.dovepress.com/article/255205)

**Supplement Table 1 – Breast Milk Total Cysteine Concentrations after Oral L-Cystine Supplements**

| <b>Time</b>                        | <b>No supplement<br/>(Mean±SD)<br/>mg/100ml</b> | <b>1.5 g<br/>(Mean±SD)<br/>mg/100ml</b> | <b>3 g<br/>(Mean±SD)<br/>mg/100ml</b> |
|------------------------------------|-------------------------------------------------|-----------------------------------------|---------------------------------------|
| Before supplement                  | 24.87±4.39                                      | 28±15.6                                 | 27.25±16.33                           |
| 30 minutes after supplement intake | 26.12±7.62                                      | 26.87±11                                | 32.87±23.76                           |
| 2 hours after supplement intake    | 23.12±5.74                                      | 27.25±10.26                             | 29.37±10.25                           |
| 4 hours after supplement intake    | 24.87±5.71                                      | 28.12±9.92                              | 28.12±13.63                           |
| 6 hours after supplement intake    | 24.87±8.95                                      | 27.37±6.21                              | 27.25±13.15                           |
| 8 hours after supplement intake    | 24±9.16                                         | 24.37±7.8                               | 26.25±13.4                            |

**Supplement Table 2 – Breast Milk Free Cysteine Concentrations after Oral L-Cystine Supplements**

| <b>Time</b>                        | <b>No supplement<br/>(Mean±SD)<br/>mg/100ml</b> | <b>1.5 g<br/>(Mean±SD)<br/>mg/100ml</b> | <b>3 g<br/>(Mean±SD)<br/>mg/100ml</b> |
|------------------------------------|-------------------------------------------------|-----------------------------------------|---------------------------------------|
| Before supplement                  | 0.33±0.12                                       | 0.37±0.13                               | 0.28±0.04                             |
| 30 minutes after supplement intake | 0.32±0.14                                       | 0.38±0.17                               | 0.45±0.1                              |
| 2 hours after supplement intake    | 0.34±0.12                                       | 0.66±0.34                               | 0.72±0.29                             |
| 4 hours after supplement intake    | 0.37±0.12                                       | 0.58±0.23                               | 0.85±0.57                             |
| 6 hours after supplement intake    | 0.34±0.15                                       | 0.52±0.17                               | 0.6±0.18                              |
| 8 hours after supplement intake    | 0.32±0.07                                       | 0.39±0.17                               | 0.43±0.2                              |

**Supplement Table 3 – Plasma Free Cysteine Concentrations after Oral L-Cystine Supplements**

| <b>Time</b>                        | <b>No supplement<br/>(Mean±SD)<br/>mg/100ml</b> | <b>1.5 g<br/>(Mean±SD)<br/>mg/100ml</b> | <b>3 g<br/>(Mean±SD)<br/>mg/100ml</b> |
|------------------------------------|-------------------------------------------------|-----------------------------------------|---------------------------------------|
| 15 minutes before supplement       | 1.28±0.57                                       | 1.08±0.36                               | 1.51±0.61                             |
| 5 minutes before supplement        | 1.43±0.48                                       | 1.25±0.38                               | 1.27±0.57                             |
| 30 minutes after supplement intake | 1.14±0.3                                        | 1.11±0.76                               | 1.68±0.85                             |
| 1 hour after supplement intake     | 1.05±0.5                                        | 1.42±0.42                               | 1.55±0.56                             |
| 2 hours after supplement intake    | 1.12±0.27                                       | 1.46±0.72                               | 1.6±0.76                              |
| 3 hours after supplement intake    | 1.06±0.28                                       | 1.38±0.78                               | 1.13±0.29                             |
| 4 hours after supplement intake    | 1.07±0.34                                       | 1.23±0.59                               | 1.17±0.23                             |
| 6 hours after supplement intake    | 1.3±0.58                                        | 1.38±0.56                               | 1.54±0.89                             |

**Supplement Table 4 – Free Cysteine Levels in Breast Milk after Oral L-Cysteine and Common Infant Formula**

| <b>Group</b>         | <b>Free Cysteine<br/>(Mean±SD) mg/100ml</b> |
|----------------------|---------------------------------------------|
| No Supplement        | 0.33±0.08                                   |
| 1.5 g Cysteine       | 0.51±0.17                                   |
| 3 g Cysteine         | 0.61±0.21                                   |
| Enfamil Liquid       | 0                                           |
| Parents Choice       | 0                                           |
| Enfamil A+ Gentlease | 0                                           |
| Good Start 2         | <0.17                                       |
| Alimentum            | 8.16±1.33                                   |
| Nutramigen           | 34±10.27                                    |

Supplementary Figure 1. Flow Chart of Study Participant Recruitment

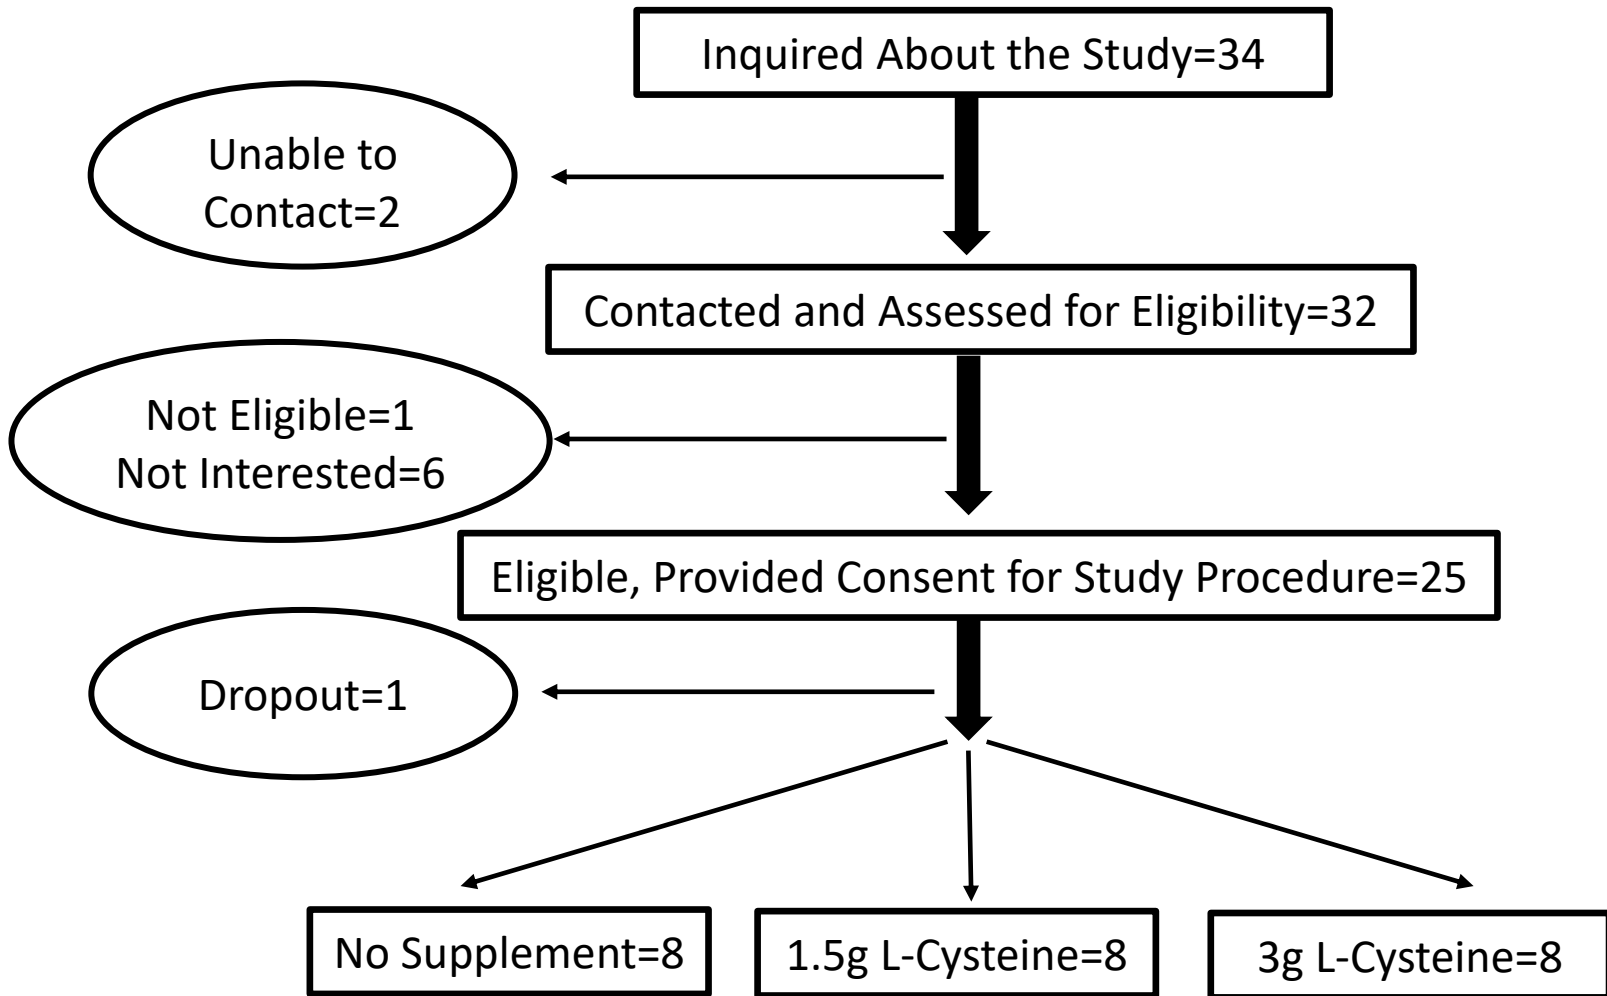

Supplement: Supplementary file 1 [file get_supplementary_file.php]
